# Supplementary material for: RAVAR: a curated repository for rare variant–trait associations
Source: PubMed Central journal article supplement (PMC10767942; doi:10.1093/nar/gkad876), 2023-10-13
Supplement: gkad876_supplemental_file.pdf [file gkad876_supplemental_file.pdf]

**Supplementary Table S1.** Number of association entries for each rare variant association method.

| <b><i>Method/Software</i></b>             | <b><i>#Number of association entries</i></b> | <b><i>PMID of the corresponding publication of Method/Software</i></b> |
|-------------------------------------------|----------------------------------------------|------------------------------------------------------------------------|
| collapsing analysis                       | 48529                                        | 23176082; 34375979; 18691683                                           |
| SKAT                                      | 10768                                        | 21737059                                                               |
| Burden test                               | 9733                                         | 23483651; 36755099; 19214210; 20471002                                 |
| BOLT-LMM                                  | 1499                                         | 25642633                                                               |
| SAIGE-GENE+                               | 1426                                         | 36138231                                                               |
| SKAT-O                                    | 1053                                         | 22863193                                                               |
| STAAR-SKAT                                | 736                                          | 36303018                                                               |
| aSPU                                      | 470                                          | 24831820                                                               |
| ACAT-V                                    | 467                                          | 30849328                                                               |
| F-distributed statistics                  | 163                                          | 26058849                                                               |
| LRT                                       | 137                                          | 27980649                                                               |
| RLRT                                      | 131                                          | 36088354                                                               |
| TADA model                                | 125                                          | 23966865                                                               |
| GATK                                      | 108                                          | 20644199                                                               |
| F-approximation tests                     | 95                                           | 25809955                                                               |
| MetaSTAAR                                 | 94                                           | 36564505                                                               |
| VEGAS                                     | 86                                           | 20598278                                                               |
| CMC method                                | 77                                           | 18691683                                                               |
| SAIGE-GENE                                | 64                                           | 32424355                                                               |
| ExactVCTest                               | 52                                           | 27646141                                                               |
| STAR Method                               | 44                                           | 32492392                                                               |
| VT                                        | 43                                           | 20471002                                                               |
| C-alpha                                   | 39                                           | 21408211                                                               |
| two-stage method                          | 35                                           | 19847924                                                               |
| maxT                                      | 19                                           | 21738570                                                               |
| WSS                                       | 18                                           | 19214210                                                               |
| AdaJoint                                  | 17                                           | 24022295                                                               |
| rareMETALS                                | 15                                           | 24894501                                                               |
| LF-KM                                     | 14                                           | 27161037                                                               |
| RQTests                                   | 12                                           | 28633423                                                               |
| Meta-MultiSKAT                            | 11                                           | 31433078                                                               |
| MetaSKAT-O                                | 11                                           | 23768515                                                               |
| fitDNM                                    | 10                                           | 26235986                                                               |
| MetaSKAT                                  | 10                                           | 23768515                                                               |
| FLM                                       | 9                                            | 22889854                                                               |
| MAGMA                                     | 9                                            | 25885710                                                               |
| pVAASST                                   | 9                                            | 24837662                                                               |
| ARTP method                               | 7                                            | 21209154                                                               |
| TASER                                     | 5                                            | 27152526                                                               |
| MURAT                                     | 4                                            | 26860061                                                               |
| Cox BT LRT                                | 3                                            | 26782979                                                               |
| FB-GGRF                                   | 3                                            | 27061818                                                               |
| Rasch-based multi-marker association test | 3                                            | 26379234                                                               |

|                             |   |          |
|-----------------------------|---|----------|
| ANRV                        | 2 | 19810025 |
| aSKAT-O                     | 2 | 22863193 |
| ensemble learning algorithm | 2 | 26619286 |
| GEE                         | 2 | 24704269 |
| metaFARVAT                  | 2 | 31275357 |
| uFineMap                    | 2 | 26458888 |
| ARIEL                       | 1 | 22441326 |
| GATES                       | 1 | 21397060 |
| GESE                        | 1 | 28191685 |
| haplotype method            | 1 | 27980634 |
| Hybrid BOMP                 | 1 | 23358228 |
| Hybrid BOMP+VEST            | 1 | 23358228 |
| MiSTF                       | 1 | 23483651 |
| Positional BOMP             | 1 | 23358228 |
| qMSAT                       | 1 | 22262732 |
| RAML                        | 1 | 16986161 |
| VT+VEST                     | 1 | 23358228 |

**Supplementary Table S2.** Information for publications collected in the RAVAR database.

| <b>PMID</b> | <b>Title</b>                                                                                                                                    | <b>First Author</b> | <b>Journal /Book</b> | <b>Publication Year</b> | <b>DOI</b>                 |
|-------------|-------------------------------------------------------------------------------------------------------------------------------------------------|---------------------|----------------------|-------------------------|----------------------------|
| 37301943    | Rare genetic variants impact muscle strength                                                                                                    | Huang Y             | Nat Commun           | 2023                    | 10.1038/s41467-023-39247-1 |
| 37262146    | Rare penetrant mutations confer severe risk of common diseases                                                                                  | Fiziev PP           | Science              | 2023                    | 10.1126/science.abo1131    |
| 36914870    | Schizophrenia risk conferred by rare protein-truncating variants is conserved across diverse human populations                                  | Liu D               | Nat Genet            | 2023                    | 10.1038/s41588-023-01305-1 |
| 36809768    | Effects of protein-coding variants on blood metabolite measurements and clinical biomarkers in the UK Biobank                                   | Nag A               | Am J Hum Genet       | 2023                    | 10.1016/j.ajhg.2023.02.002 |
| 36778668    | Systematic single-variant and gene-based association testing of thousands of phenotypes in 394,841 UK Biobank exomes                            | Karczewski KJ       | Cell Genom           | 2022                    | 10.1016/j.xgen.2022.100168 |
| 36672889    | Skin Phototype and Disease: A Comprehensive Genetic Approach to Pigmentary Traits Pleiotropy Using PRS in the GCAT Cohort                       | Farré X             | Genes (Basel)        | 2023                    | 10.3390/genes14010149      |
| 36672803    | Exome Array Analysis of 9721 Ischemic Stroke Cases from the SiGN Consortium                                                                     | Xu H                | Genes (Basel)        | 2022                    | 10.3390/genes14010061      |
| 36635386    | Genomic atlas of the plasma metabolome prioritizes metabolites implicated in human diseases                                                     | Chen Y              | Nat Genet            | 2023                    | 10.1038/s41588-022-01270-1 |
| 36568030    | Whole-exome sequence analysis of anthropometric traits illustrates challenges in identifying effects of rare genetic variants                   | Young KL            | HGG Adv              | 2022                    | 10.1016/j.xhgg.2022.100163 |
| 36564505    | Powerful, scalable and resource-efficient meta-analysis of rare variant associations in large whole genome sequencing studies                   | Li X                | Nat Genet            | 2023                    | 10.1038/s41588-022-01225-6 |
| 36450729    | Whole-exome sequencing study identifies rare variants and genes associated with intraocular pressure and glaucoma                               | Gao XR              | Nat Commun           | 2022                    | 10.1038/s41467-022-35188-3 |
| 36419110    | Whole-exome sequencing identifies novel protein-altering variants associated with serum apolipoprotein and lipid concentrations                 | Sandholm N          | Genome Med           | 2022                    | 10.1186/s13073-022-01135-6 |
| 36333282    | The contribution of common and rare genetic variants to variation in metabolic traits in 288,137 East Asians                                    | Kim YJ              | Nat Commun           | 2022                    | 10.1038/s41467-022-34163-2 |
| 36311265    | Whole-exome sequencing in 415,422 individuals identifies rare variants associated with mitochondrial DNA copy number                            | Pillalamarri V      | HGG Adv              | 2022                    | 10.1016/j.xhgg.2022.100147 |
| 36303018    | A framework for detecting noncoding rare-variant associations of large-scale whole-genome sequencing studies                                    | Li Z                | Nat Methods          | 2022                    | 10.1038/s41592-022-01640-x |
| 36297015    | Whole Exome Sequencing Study Identifies Novel Rare Risk Variants for Habitual Coffee Consumption Involved in Olfactory Receptor and Hyperphagia | Cheng B             | Nutrients            | 2022                    | 10.3390/nu14204330         |
| 36280733    | A combined polygenic score of 21,293 rare and 22 common variants improves diabetes diagnosis based on hemoglobin A1C levels                     | Dornbos P           | Nat Genet            | 2022                    | 10.1038/s41588-022-01200-1 |
| 36224396    | A saturated map of common genetic variants associated with human height                                                                         | Yengo L             | Nature               | 2022                    | 10.1038/s41586-022-05275-y |

|          |                                                                                                                                                        |              |                          |      |                            |
|----------|--------------------------------------------------------------------------------------------------------------------------------------------------------|--------------|--------------------------|------|----------------------------|
| 36220816 | Whole genome sequence analysis of blood lipid levels in >66,000 individuals                                                                            | Selvaraj MS  | Nat Commun               | 2022 | 10.1038/s41467-022-33510-7 |
| 36168886 | Differences and commonalities in the genetic architecture of protein quantitative trait loci in European and Arab populations                          | Thareja G    | Hum Mol Genet            | 2023 | 10.1093/hmg/dac243         |
| 36138231 | SAIGE-GENE+ improves the efficiency and accuracy of set-based rare variant association tests                                                           | Zhou W       | Nat Genet                | 2022 | 10.1038/s41588-022-01178-w |
| 36088354 | Identifying interpretable gene-biomarker associations with functionally informed kernel-based tests in 190,000 exomes                                  | Monti R      | Nat Commun               | 2022 | 10.1038/s41467-022-32864-2 |
| 36050321 | Genetic analyses of the electrocardiographic QT interval and its components identify additional loci and pathways                                      | Young WJ     | Nat Commun               | 2022 | 10.1038/s41467-022-32821-z |
| 36038634 | Large-scale sequencing identifies multiple genes and rare variants associated with Crohn's disease susceptibility                                      | Sazonovs A   | Nat Genet                | 2022 | 10.1038/s41588-022-01156-2 |
| 35982160 | Rare coding variation provides insight into the genetic architecture and phenotypic context of autism                                                  | Fu JM        | Nat Genet                | 2022 | 10.1038/s41588-022-01104-0 |
| 35954343 | Germline Variants Associated with Nasopharyngeal Carcinoma Predisposition Identified through Whole-Exome Sequencing                                    | Lee NY       | Cancers (Basel)          | 2022 | 10.3390/cancers14153680    |
| 35935937 | Gene-Based Variant Analysis of Whole-Exome Sequencing in Relation to Eosinophil Count                                                                  | Höglund J    | Front Immunol            | 2022 | 10.3389/fimmu.2022.862255  |
| 35741860 | Identifying Rare Genetic Variants of Immune Mediators as Risk Factors for Autism Spectrum Disorder                                                     | Cai C        | Genes (Basel)            | 2022 | 10.3390/genes13061098      |
| 35580180 | Impact of natural selection on global patterns of genetic variation and association with clinical phenotypes at genes involved in SARS-CoV-2 infection | Zhang C      | Proc Natl Acad Sci U S A | 2022 | 10.1073/pnas.2123000119    |
| 35552711 | Whole-exome sequencing of 14 389 individuals from the ESP and CHARGE consortia identifies novel rare variation associated with hemostatic factors      | Pankratz N   | Hum Mol Genet            | 2022 | 10.1093/hmg/dac100         |
| 35401413 | Deciphering Genetic Susceptibility to Tuberculous Meningitis                                                                                           | Schurz H     | Front Neurol             | 2022 | 10.3389/fneur.2022.820168  |
| 35361970 | Polygenic prediction of educational attainment within and between families from genome-wide association analyses in 3 million individuals              | Okbay A      | Nat Genet                | 2022 | 10.1038/s41588-022-01016-z |
| 35177841 | Analysis of rare genetic variation underlying cardiometabolic diseases and traits among 200,000 individuals in the UK Biobank                          | Jurgens SJ   | Nat Genet                | 2022 | 10.1038/s41588-021-01011-w |
| 35115689 | Combined effects of host genetics and diet on human gut microbiota and incident disease in a single population cohort                                  | Qin Y        | Nat Genet                | 2022 | 10.1038/s41588-021-00991-z |
| 35078996 | A genome-wide association study of serum proteins reveals shared loci with common diseases                                                             | Gudjonsson A | Nat Commun               | 2022 | 10.1038/s41467-021-27850-z |
| 34887591 | The power of genetic diversity in genome-wide association studies of lipids                                                                            | Graham SE    | Nature                   | 2021 | 10.1038/s41586-021-04064-3 |
| 34737426 | A generalized linear mixed model association tool for biobank-scale data                                                                               | Jiang L      | Nat Genet                | 2021 | 10.1038/s41588-021-00954-4 |
| 34662886 | Exome sequencing and analysis of 454,787 UK Biobank participants                                                                                       | Backman JD   | Nature                   | 2021 | 10.1038/s41586-021-04103-z |
| 34648354 | Mapping the proteo-genomic convergence of human diseases                                                                                               | Pietzner M   | Science                  | 2021 | 10.1126/science.abj1541    |

|          |                                                                                                                                                                                       |               |                                  |      |                                  |
|----------|---------------------------------------------------------------------------------------------------------------------------------------------------------------------------------------|---------------|----------------------------------|------|----------------------------------|
| 34626176 | Whole-exome sequencing reveals a role of HTRA1 and EGFL8 in brain white matter hyperintensities                                                                                       | Malik R       | Brain                            | 2021 | 10.1093/brain/awab253            |
| 34610981 | Genetic Studies of Metabolomics Change After a Liquid Meal Illuminate Novel Pathways for Glucose and Lipid Metabolism                                                                 | Li-Gao R      | Diabetes                         | 2021 | 10.2337/db21-0397                |
| 34594039 | A cross-population atlas of genetic associations for 220 human phenotypes                                                                                                             | Sakaue S      | Nat Genet                        | 2021 | 10.1038/s41588-021-00931-x       |
| 34376796 | Analyses of biomarker traits in diverse UK biobank participants identify associations missed by European-centric analysis strategies                                                  | Sun Q         | J Hum Genet                      | 2022 | 10.1038/s10038-021-00968-0       |
| 34375979 | Rare variant contribution to human disease in 281,104 UK Biobank exomes                                                                                                               | Wang Q        | Nature                           | 2021 | 10.1038/s41586-021-03855-y       |
| 34321204 | Testosterone and socioeconomic position: Mendelian randomization in 306,248 men and women in UK Biobank                                                                               | Harrison S    | Sci Adv                          | 2021 | 10.1126/sciadv.abf8257           |
| 34260947 | Common haplotypes at the CFH locus and low-frequency variants in CFHR2 and CFHR5 associate with systemic FHR concentrations and age-related macular degeneration                      | Lorés-Motta L | Am J Hum Genet                   | 2021 | 10.1016/j.ajhg.2021.06.002       |
| 34244158 | Genetic Analysis of Functional Rare Germline Variants across Nine Cancer Types from an Electronic Health Record Linked Biobank                                                        | Shivakumar M  | Cancer Epidemiol Biomarkers Prev | 2021 | 10.1158/1055-9965.EPI-21-0082    |
| 34230933 | Impact of natural selection on global patterns of genetic variation, and association with clinical phenotypes, at genes involved in SARS-CoV-2 infection                              | Zhang C       | medRxiv                          | 2021 | 10.1101/2021.06.28.21259529      |
| 34226706 | Whole-exome imputation within UK Biobank powers rare coding variant association and fine-mapping analyses                                                                             | Barton AR     | Nat Genet                        | 2021 | 10.1038/s41588-021-00892-1       |
| 34131117 | Genome sequencing unveils a regulatory landscape of platelet reactivity                                                                                                               | Keramati AR   | Nat Commun                       | 2021 | 10.1038/s41467-021-23470-9       |
| 34125832 | Whole-exome sequencing reveals insights into genetic susceptibility to Congenital Zika Syndrome                                                                                       | Borda V       | PLoS Negl Trop Dis               | 2021 | 10.1371/journal.pntd.0009507     |
| 34016428 | Identifying susceptibility genes for primary ovarian insufficiency on the high-risk genetic background of a fragile X premutation                                                     | Trevino CE    | Fertil Steril                    | 2021 | 10.1016/j.fertnstert.2021.04.021 |
| 33919687 | Genetic Analysis Reveals Rare Variants in T-Cell Response Gene MR1 Associated with Poor Overall Survival after Urothelial Cancer Diagnosis                                            | Bang L        | Cancers (Basel)                  | 2021 | 10.3390/cancers13081864          |
| 33804025 | Set-Based Rare Variant Expression Quantitative Trait Loci in Blood and Brain from Alzheimer Disease Study Participants                                                                | Patel D       | Genes (Basel)                    | 2021 | 10.3390/genes12030419            |
| 33763119 | Genome-Wide Identification of Rare and Common Variants Driving Triglyceride Levels in a Nevada Population                                                                             | Read RW       | Front Genet                      | 2021 | 10.3389/fgene.2021.639418        |
| 33679876 | Whole-Exome Sequencing and hiPSC Cardiomyocyte Models Identify MYRIP, TRAPPC11, and SLC27A6 of Potential Importance to Left Ventricular Hypertrophy in an African Ancestry Population | Irvin MR      | Front Genet                      | 2021 | 10.3389/fgene.2021.588452        |
| 33654115 | Identification of candidate genes and pathways in retinopathy of prematurity by whole exome sequencing of preterm infants enriched in phenotypic extremes                             | Kim SJ        | Sci Rep                          | 2021 | 10.1038/s41598-021-83552-y       |
| 33574263 | Rare genetic variants affecting urine metabolite levels link population variation to inborn errors of metabolism                                                                      | Cheng Y       | Nat Commun                       | 2021 | 10.1038/s41467-020-20877-8       |

|          |                                                                                                                                                  |                |                        |      |                              |
|----------|--------------------------------------------------------------------------------------------------------------------------------------------------|----------------|------------------------|------|------------------------------|
| 33432171 | Exome-wide evaluation of rare coding variants using electronic health records identifies new gene-phenotype associations                         | Park J         | Nat Med                | 2021 | 10.1038/s41591-020-1133-8    |
| 33257650 | Identity-by-descent detection across 487,409 British samples reveals fine scale population structure and ultra-rare variant associations         | Nait Saada J   | Nat Commun             | 2020 | 10.1038/s41467-020-19588-x   |
| 33230300 | Discovery of rare variants associated with blood pressure regulation through meta-analysis of 1.3 million individuals                            | Surendran P    | Nat Genet              | 2020 | 10.1038/s41588-020-00713-x   |
| 33226994 | A phenome-wide association study of 26 mendelian genes reveals phenotypic expressivity of common and rare variants within the general population | Tcheandjie u C | PLoS Genet             | 2020 | 10.1371/journal.pgen.1008802 |
| 33097823 | The genetic architecture of appendicular lean mass characterized by association analysis in the UK Biobank study                                 | Pei YF         | Commun Biol            | 2020 | 10.1038/s42003-020-01334-0   |
| 33093519 | Identifying genetic factors that contribute to the increased risk of congenital heart defects in infants with Down syndrome                      | Trevino CE     | Sci Rep                | 2020 | 10.1038/s41598-020-74650-4   |
| 32929287 | Complex genetic signatures in immune cells underlie autoimmunity and inform therapy                                                              | Orrù V         | Nat Genet              | 2020 | 10.1038/s41588-020-0684-4    |
| 32888494 | The Polygenic and Monogenic Basis of Blood Traits and Diseases                                                                                   | Vuckovic D     | Cell                   | 2020 | 10.1016/j.cell.2020.08.008   |
| 32888493 | Trans-ethnic and Ancestry-Specific Blood-Cell Genetics in 746,667 Individuals from 5 Global Populations                                          | Chen MH        | Cell                   | 2020 | 10.1016/j.cell.2020.06.045   |
| 32492392 | Exome Sequencing Identifies Genes and Gene Sets Contributing to Severe Childhood Obesity, Linking PHIP Variants to Repressed POMC Transcription  | Marenne G      | Cell Metab             | 2020 | 10.1016/j.cmet.2020.05.007   |
| 32436959 | Analysis of putative cis-regulatory elements regulating blood pressure variation                                                                 | Nandakumar P   | Hum Mol Genet          | 2020 | 10.1093/hmg/ddaa098          |
| 32424355 | Scalable generalized linear mixed model for region-based association tests in large biobanks and cohorts                                         | Zhou W         | Nat Genet              | 2020 | 10.1038/s41588-020-0621-6    |
| 32415273 | The exhaustive genomic scan approach, with an application to rare-variant association analysis                                                   | Kanoungi G     | Eur J Hum Genet        | 2020 | 10.1038/s41431-020-0639-3    |
| 32100372 | Convex combination sequence kernel association test for rare-variant studies                                                                     | Posner DC      | Genet Epidemiol        | 2020 | 10.1002/gepi.22287           |
| 32100327 | Risk factors for progression of age-related macular degeneration                                                                                 | Heesterbeek TJ | Ophthalmic Physiol Opt | 2020 | 10.1111/opo.12675            |
| 32042192 | Using human genetics to understand the disease impacts of testosterone in men and women                                                          | Ruth KS        | Nat Med                | 2020 | 10.1038/s41591-020-0751-5    |
| 31992710 | Genome-wide rare variant analysis for thousands of phenotypes in over 70,000 exomes from two cohorts                                             | Cirulli ET     | Nat Commun             | 2020 | 10.1038/s41467-020-14288-y   |
| 31866045 | UK Biobank Whole-Exome Sequence Binary Phenome Analysis with Robust Region-Based Rare-Variant Test                                               | Zhao Z         | Am J Hum Genet         | 2020 | 10.1016/j.ajhg.2019.11.012   |
| 31748686 | An exome-wide rare variant analysis of Korean men identifies three novel genes predisposing to prostate cancer                                   | Oh JJ          | Sci Rep                | 2019 | 10.1038/s41598-019-53445-2   |
| 31433078 | Meta-MultiSKAT: Multiple phenotype meta-analysis for region-based association test                                                               | Dutta D        | Genet Epidemiol        | 2019 | 10.1002/gepi.22248           |
| 31367044 | Exome sequencing of Finnish isolates enhances rare-variant association power                                                                     | Locke AE       | Nature                 | 2019 | 10.1038/s41586-019-1457-z    |

|          |                                                                                                                                                           |                |                          |      |                                            |
|----------|-----------------------------------------------------------------------------------------------------------------------------------------------------------|----------------|--------------------------|------|--------------------------------------------|
| 31338326 | Exome-Wide Rare Variant Analysis From the DiscovEHR Study Identifies Novel Candidate Predisposition Genes for Endometrial Cancer                          | Shivakumar M   | Front Oncol              | 2019 | 10.3389/fonc.2019.00574                    |
| 31275357 | metaFARVAT: An Efficient Tool for Meta-Analysis of Family-Based, Case-Control, and Population-Based Rare Variant Association Studies                      | Wang L         | Front Genet              | 2019 | 10.3389/fgene.2019.00572                   |
| 31242253 | Pharmacogenomics of statin-related myopathy: Meta-analysis of rare variants from whole-exome sequencing                                                   | Floyd JS       | PLoS One                 | 2019 | 10.1371/journal.pone.0218115               |
| 31235378 | Effectiveness of Intensive Rehabilitation Therapy on Functional Outcomes After Stroke: A Propensity Score Analysis Based on Japan Rehabilitation Database | Kamo T         | J Stroke Cerebrovasc Dis | 2019 | 10.1016/j.jstrokecerebrovasdis.2019.06.007 |
| 31136621 | Exome chip association study excluded the involvement of rare coding variants with large effect sizes in the etiology of anorectal malformations          | van de Putte R | PLoS One                 | 2019 | 10.1371/journal.pone.0217477               |
| 31034468 | FunSPU: A versatile and adaptive multiple functional annotation-based association test of whole-genome sequencing data                                    | Ma Y           | PLoS Genet               | 2019 | 10.1371/journal.pgen.1008081               |
| 31019915 | Novel Complex Interactions between Mitochondrial and Nuclear DNA in Schizophrenia and Bipolar Disorder                                                    | Schulman A     | Mol Neuropsychiatry      | 2019 | 10.1159/000495658                          |
| 30976013 | Exome array analysis of rare and low frequency variants in amyotrophic lateral sclerosis                                                                  | Dekker AM      | Sci Rep                  | 2019 | 10.1038/s41598-019-42091-3                 |
| 30718457 | Genetic loci for alcohol-related life events and substance-induced affective symptoms: indexing the "dark side" of addiction                              | Peng Q         | Transl Psychiatry        | 2019 | 10.1038/s41398-019-0397-6                  |
| 30679032 | Exome Chip Meta-analysis Fine Maps Causal Variants and Elucidates the Genetic Architecture of Rare Coding Variants in Smoking and Alcohol Use             | Brazel DM      | Biol Psychiatry          | 2019 | 10.1016/j.biopsych.2018.11.024             |
| 30665703 | Assessing the Pathogenicity, Penetrance, and Expressivity of Putative Disease-Causing Variants in a Population Setting                                    | Wright CF      | Am J Hum Genet           | 2019 | 10.1016/j.ajhg.2018.12.015                 |
| 30659681 | A large-scale exome array analysis of venous thromboembolism                                                                                              | Lindström S    | Genet Epidemiol          | 2019 | 10.1002/gepi.22187                         |
| 30578418 | Trans-ethnic association study of blood pressure determinants in over 750,000 individuals                                                                 | Giri A         | Nat Genet                | 2019 | 10.1038/s41588-018-0303-9                  |
| 30382371 | Rare variants in the neuronal ceroid lipofuscinosis gene MFSD8 are candidate risk factors for frontotemporal dementia                                     | Geier EG       | Acta Neuropathol         | 2019 | 10.1007/s00401-018-1925-9                  |
| 30377230 | Genetic Analysis of 400 Patients Refines Understanding and Implicates a New Gene in Atypical Hemolytic Uremic Syndrome                                    | Bu F           | J Am Soc Nephrol         | 2018 | 10.1681/ASN.2018070759                     |
| 30315176 | Large-scale whole-exome sequencing association studies identify rare functional variants influencing serum urate levels                                   | Tin A          | Nat Commun               | 2018 | 10.1038/s41467-018-06620-4                 |
| 30255815 | Rare variants in the splicing regulatory elements of EXOC3L4 are associated with brain glucose metabolism in Alzheimer's disease                          | Miller JE      | BMC Med Genomics         | 2018 | 10.1186/s12920-018-0390-6                  |
| 30212457 | Exome sequencing-based identification of novel type 2 diabetes risk allele loci in the Qatari population                                                  | O'Beirne SL    | PLoS One                 | 2018 | 10.1371/journal.pone.0199837               |

|          |                                                                                                                                                          |                    |                                  |      |                                  |
|----------|----------------------------------------------------------------------------------------------------------------------------------------------------------|--------------------|----------------------------------|------|----------------------------------|
| 30206357 | Exploring rare and low-frequency variants in the Saguenay-Lac-Saint-Jean population identified genes associated with asthma and allergy traits           | Morin A            | Eur J Hum Genet                  | 2019 | 10.1038/s41431-018-0266-4        |
| 30175238 | Meta-analysis of exome array data identifies six novel genetic loci for lung function                                                                    | Jackson VE         | Wellcome Open Res                | 2018 | 10.12688/wellcomeopenres.12583.3 |
| 30167848 | Rare coding variant analysis in a large cohort of Ashkenazi Jewish families with inflammatory bowel disease                                              | Schiff ER          | Hum Genet                        | 2018 | 10.1007/s00439-018-1927-7        |
| 30140000 | Deep-coverage whole genome sequences and blood lipids among 16,324 individuals                                                                           | Natarajan P        | Nat Commun                       | 2018 | 10.1038/s41467-018-05747-8       |
| 30108311 | Whole exome sequencing study identifies novel rare and common Alzheimer's-Associated variants involved in immune response and transcriptional regulation | Bis JC             | Mol Psychiatry                   | 2020 | 10.1038/s41380-018-0112-7        |
| 30012220 | Exome-chip meta-analysis identifies novel loci associated with cardiac conduction, including ADAMTS6                                                     | Prins BP           | Genome Biol                      | 2018 | 10.1186/s13059-018-1457-6        |
| 29898891 | Germline Variation and Breast Cancer Incidence: A Gene-Based Association Study and Whole-Genome Prediction of Early-Onset Breast Cancer                  | Scannell Bryan M   | Cancer Epidemiol Biomarkers Prev | 2018 | 10.1158/1055-9965.EPI-17-1185    |
| 29875488 | Genomic atlas of the human plasma proteome                                                                                                               | Sun BB             | Nature                           | 2018 | 10.1038/s41586-018-0175-2        |
| 29867916 | Evaluating the Genetics of Common Variable Immunodeficiency: Monogenetic Model and Beyond                                                                | de Valles-Ibáñez G | Front Immunol                    | 2018 | 10.3389/fimmu.2018.00636         |
| 29852030 | Association of Genetic Variants With Response to Anti-Vascular Endothelial Growth Factor Therapy in Age-Related Macular Degeneration                     | Lorés-Motta L      | JAMA Ophthalmol                  | 2018 | 10.1001/jamaophthalmol.2018.2019 |
| 29748316 | Common and Rare Coding Genetic Variation Underlying the Electrocardiographic PR Interval                                                                 | Lin H              | Circ Genom Precis Med            | 2018 | 10.1161/CIRCGEN.117.002037       |
| 29486463 | Genetic Variation in Genes Underlying Diverse Dementias May Explain a Small Proportion of Cases in the Alzheimer's Disease Sequencing Project            | Blue EE            | Dement Geriatr Cogn Disord       | 2018 | 10.1159/000485503                |
| 29455858 | A Large-Scale Multi-ancestry Genome-wide Study Accounting for Smoking Behavior Identifies Multiple Significant Loci for Blood Pressure                   | Sung YJ            | Am J Hum Genet                   | 2018 | 10.1016/j.ajhg.2018.01.015       |
| 29441677 | A novel susceptibility locus in MST1 and gene-gene interaction network for Crohn's disease in the Chinese population                                     | Wu WKK             | J Cell Mol Med                   | 2018 | 10.1111/jcmm.13530               |
| 29411426 | Integrating eQTL data with GWAS summary statistics in pathway-based analysis with application to schizophrenia                                           | Wu C               | Genet Epidemiol                  | 2018 | 10.1002/gepi.22110               |
| 29378355 | A Genome-wide Study of Common and Rare Genetic Variants Associated with Circulating Thrombin Activatable Fibrinolysis Inhibitor                          | Stanne TM          | Thromb Haemost                   | 2018 | 10.1160/TH17-04-0249             |
| 29321365 | Genome-based exome sequencing analysis identifies GYG1, DIS3L and DDRGK1 are associated with myocardial infarction in Koreans                            | Lee JY             | J Genet                          | 2017 | 10.1007/s12041-017-0854-z        |



|          |                                                                                                                                                                 |                |                     |      |                                      |
|----------|-----------------------------------------------------------------------------------------------------------------------------------------------------------------|----------------|---------------------|------|--------------------------------------|
| 29273807 | Protein-altering variants associated with body mass index implicate pathways that control energy intake and expenditure in obesity                              | Turcot V       | Nat Genet           | 2018 | 10.1038/s41588-017-0011-x            |
| 29263008 | Investigating the genetic architecture of dementia with Lewy bodies: a two-stage genome-wide association study                                                  | Guerreiro R    | Lancet Neurol       | 2018 | 10.1016/S1474-4422(17)30400-3        |
| 29218897 | Codon bias among synonymous rare variants is associated with Alzheimer's disease imaging biomarker                                                              | Miller JE      | Pac Symp Biocomput  | 2018 |                                      |
| 29190701 | A non-threshold region-specific method for detecting rare variants in complex diseases                                                                          | Hsieh AR       | PLoS One            | 2017 | 10.1371/journal.pone.0188566         |
| 29185836 | Exome-chip meta-analysis identifies association between variation in ANKRD26 and platelet aggregation                                                           | Chen MH        | Platelets           | 2019 | 10.1080/09537104.2017.1384538        |
| 29155802 | Investigation of common, low-frequency and rare genome-wide variation in anorexia nervosa                                                                       | Huckins LM     | Mol Psychiatry      | 2018 | 10.1038/mp.2017.88                   |
| 29093530 | Sporadic Hirschsprung Disease: Mutational Spectrum and Novel Candidate Genes Revealed by Next-generation Sequencing                                             | Zhang Z        | Sci Rep             | 2017 | 10.1038/s41598-017-14835-6           |
| 28973304 | Exome-wide association study reveals novel psoriasis susceptibility locus at TNFSF15 and rare protective alleles in genes contributing to type I IFN signalling | Dand N         | Hum Mol Genet       | 2017 | 10.1093/hmg/ddx328                   |
| 28900119 | Analysis of potential protein-modifying variants in 9000 endometriosis patients and 150000 controls of European ancestry                                        | Sapkota Y      | Sci Rep             | 2017 | 10.1038/s41598-017-10440-9           |
| 28879196 | Assessment of Whole-Exome Sequence Data in Attempted Suicide within a Bipolar Disorder Cohort                                                                   | Monson ET      | Mol Neuropsychiatry | 2017 | 10.1159/000454773                    |
| 28867149 | Establishing the role of rare coding variants in known Parkinson's disease risk loci                                                                            | Jansen IE      | Neurobiol Aging     | 2017 | 10.1016/j.neurobiolaging.2017.07.009 |
| 28814775 | Mutational profile of rare variants in inflammasome-related genes in Behçet disease: A Next Generation Sequencing approach                                      | Burillo-Sanz S | Sci Rep             | 2017 | 10.1038/s41598-017-09164-7           |
| 28736464 | The Generalized Higher Criticism for Testing SNP-Set Effects in Genetic Association Studies                                                                     | Barnett I      | J Am Stat Assoc     | 2017 | 10.1080/01621459.2016.1192039        |
| 28642624 | Whole Exome Sequencing to Identify Genetic Variants Associated with Raised Atherosclerotic Lesions in Young Persons                                             | Hixson JE      | Sci Rep             | 2017 | 10.1038/s41598-017-04433-x           |
| 28633423 | rqtl: an R package for gene-level meta-analysis                                                                                                                 | Zhbannikov IY  | Bioinformatics      | 2017 | 10.1093/bioinformatics/btx395        |
| 28589856 | Association analysis of rare variants near the APOE region with CSF and neuroimaging biomarkers of Alzheimer's disease                                          | Nho K          | BMC Med Genomics    | 2017 | 10.1186/s12920-017-0267-0            |
| 28552196 | Whole-Genome Sequencing Coupled to Imputation Discovers Genetic Signals for Anthropometric Traits                                                               | Tachmazidou I  | Am J Hum Genet      | 2017 | 10.1016/j.ajhg.2017.04.014           |

|          |                                                                                                                                        |              |                                       |      |                                      |
|----------|----------------------------------------------------------------------------------------------------------------------------------------|--------------|---------------------------------------|------|--------------------------------------|
| 28539126 | Knowledge-driven binning approach for rare variant association analysis: application to neuroimaging biomarkers in Alzheimer's disease | Kim D        | BMC Med Inform Decis Mak              | 2017 | 10.1186/s12911-017-0454-0            |
| 28526295 | Large-scale exploratory genetic analysis of cognitive impairment in Parkinson's disease                                                | Mata IF      | Neurobiol Aging                       | 2017 | 10.1016/j.neurobiolaging.2017.04.009 |
| 28513607 | Variants in TTC25 affect autistic trait in patients with autism spectrum disorder and general population                               | Vojinovic D  | Eur J Hum Genet                       | 2017 | 10.1038/ejhg.2017.82                 |
| 28480134 | Common and rare genetic markers of lipid variation in subjects with type 2 diabetes from the ACCORD clinical trial                     | Marvel SW    | PeerJ                                 | 2017 | 10.7717/peerj.3187                   |
| 28436151 | Whole genome sequence association and ancestry-informed polygenic profile of EEG alpha in a Native American population                 | Peng Q       | Am J Med Genet B Neuropsychiatr Genet | 2017 | 10.1002/ajmg.b.32533                 |
| 28425186 | Association studies of low-frequency coding variants in nonsyndromic cleft lip with or without cleft palate                            | Leslie EJ    | Am J Med Genet A                      | 2017 | 10.1002/ajmg.a.38210                 |
| 28417008 | Association of gene coding variation and resting metabolic rate in a multi-ethnic sample of children and adults                        | Hellwege JN  | BMC Obes                              | 2017 | 10.1186/s40608-017-0145-5            |
| 28346466 | Common and rare exonic MUC5B variants associated with type 2 diabetes in Han Chinese                                                   | Chen G       | PLoS One                              | 2017 | 10.1371/journal.pone.0173784         |
| 28290481 | Identification of Elongated Primary Cilia with Impaired Mechanotransduction in Idiopathic Scoliosis Patients                           | Oliazadeh N  | Sci Rep                               | 2017 | 10.1038/srep44260                    |
| 28270201 | Exploration of haplotype research consortium imputation for genome-wide association studies in 20,032 Generation Scotland participants | Nagy R       | Genome Med                            | 2017 | 10.1186/s13073-017-0414-4            |
| 28265093 | Common coding variant in SERPINA1 increases the risk for large artery stroke                                                           | Malik R      | Proc Natl Acad Sci U S A              | 2017 | 10.1073/pnas.1616301114              |
| 28263315 | Whole-genome sequencing identifies common-to-rare variants associated with human blood metabolites                                     | Long T       | Nat Genet                             | 2017 | 10.1038/ng.3809                      |
| 28234671 | Rare coding variants associated with blood pressure variation in 15914 individuals of African ancestry                                 | Nandakumar P | J Hypertens                           | 2017 | 10.1097/HJH.0000000000001319         |
| 28199135 | Extreme Trait Whole-Genome Sequencing Identifies PTPRO as a Novel Candidate Gene in Emphysema with Severe Airflow Obstruction          | Radder JE    | Am J Respir Crit Care Med             | 2017 | 10.1164/rccm.201606-1147OC           |
| 28196273 | Sex and Adolescent Ethanol Exposure Influence Pavlovian Conditioned Approach                                                           | Madayag AC   | Alcohol Clin Exp Res                  | 2017 | 10.1111/acer.13354                   |
| 28196272 | Deep Sequencing of 71 Candidate Genes to Characterize Variation Associated with Alcohol Dependence                                     | Clark SL     | Alcohol Clin Exp Res                  | 2017 | 10.1111/acer.13352                   |
| 28195573 | Whole-exome sequencing of individuals from an isolated population implicates rare risk variants in bipolar disorder                    | Lescai F     | Transl Psychiatry                     | 2017 | 10.1038/tp.2017.3                    |
| 28191685 | Gene-based segregation method for identifying rare variants in family-based sequencing studies                                         | Qiao D       | Genet Epidemiol                       | 2017 | 10.1002/gepi.22037                   |

|          |                                                                                                                                                 |                |                           |      |                              |
|----------|-------------------------------------------------------------------------------------------------------------------------------------------------|----------------|---------------------------|------|------------------------------|
| 28146470 | Rare and low-frequency coding variants alter human adult height                                                                                 | Marouli E      | Nature                    | 2017 | 10.1038/nature21039          |
| 28117402 | Whole-exome sequencing of 228 patients with sporadic Parkinson's disease                                                                        | Sandor C       | Sci Rep                   | 2017 | 10.1038/srep41188            |
| 28111843 | Whole genome sequence study of cannabis dependence in two independent cohorts                                                                   | Gizer IR       | Addict Biol               | 2018 | 10.1111/adb.12489            |
| 28089252 | Practical Approaches for Whole-Genome Sequence Analysis of Heart- and Blood-Related Traits                                                      | Morrison AC    | Am J Hum Genet            | 2017 | 10.1016/j.ajhg.2016.12.009   |
| 28061514 | A Genome-Wide Association Study of Vertical Cup-Disc Ratio in a Latino Population                                                               | Nannini DR     | Invest Ophthalmol Vis Sci | 2017 | 10.1167/iovs.16-19891        |
| 28011711 | Protective coding variants in CFH and PELI3 and a variant near CTRB1 are associated with age-related macular degeneration†                      | Yu Y           | Hum Mol Genet             | 2016 | 10.1093/hmg/dw336            |
| 27980654 | Joint analysis of multiple blood pressure phenotypes in GAW19 data by using a multivariate rare-variant association test                        | Sun J          | BMC Proc                  | 2016 | 10.1186/s12919-016-0048-3    |
| 27980651 | Genetic association analysis based on a joint model of gene expression and blood pressure                                                       | Konigorski S   | BMC Proc                  | 2016 | 10.1186/s12919-016-0045-6    |
| 27980649 | Incorporation of protein binding effects into likelihood ratio test for exome sequencing data                                                   | Zhang D        | BMC Proc                  | 2016 | 10.1186/s12919-016-0043-8    |
| 27980634 | Comparison of multiple single-nucleotide variant association tests in a meta-analysis of Genetic Analysis Workshop 19 family and unrelated data | Wang S         | BMC Proc                  | 2016 | 10.1186/s12919-016-0028-7    |
| 27884205 | Whole genome sequence analysis of serum amino acid levels                                                                                       | Yu B           | Genome Biol               | 2016 | 10.1186/s13059-016-1106-x    |
| 27863252 | The Allelic Landscape of Human Blood Cell Trait Variation and Links to Common Complex Disease                                                   | Astle WJ       | Cell                      | 2016 | 10.1016/j.cell.2016.10.042   |
| 27764101 | Rare Functional Variant in TM2D3 is Associated with Late-Onset Alzheimer's Disease                                                              | Jakobsdottir J | PLoS Genet                | 2016 | 10.1371/journal.pgen.1006327 |
| 27646141 | Boosting Gene Mapping Power and Efficiency with Efficient Exact Variance Component Tests of Single Nucleotide Polymorphism Sets                 | Zhou JJ        | Genetics                  | 2016 | 10.1534/genetics.116.190454  |
| 27625572 | Whole exome sequencing of extreme age-related macular degeneration phenotypes                                                                   | Sardell RJ     | Mol Vis                   | 2016 |                              |
| 27618447 | Trans-ancestry meta-analyses identify rare and common variants associated with blood pressure and hypertension                                  | Surendran P    | Nat Genet                 | 2016 | 10.1038/ng.3654              |
| 27559110 | Collapsed methylation quantitative trait loci analysis for low frequency and rare variants                                                      | Richardson TG  | Hum Mol Genet             | 2016 | 10.1093/hmg/dw283            |
| 27466198 | Analysis with the exome array identifies multiple new independent variants in lipid loci                                                        | Kanoni S       | Hum Mol Genet             | 2016 | 10.1093/hmg/dw227            |
| 27440996 | Variation in PTCHD2, CRISP3, NAP1L4, FSCB, and AP3B2 associated with spherical equivalent                                                       | Chen F         | Mol Vis                   | 2016 |                              |
| 27378695 | Exome genotyping arrays to identify rare and low frequency variants associated with epithelial ovarian cancer risk                              | Permeth JB     | Hum Mol Genet             | 2016 | 10.1093/hmg/dw196            |
| 27355347 | Rare Variants Association Analysis in Large-Scale Sequencing Studies at the Single Locus Level                                                  | Jeng XJ        | PLoS Comput Biol          | 2016 | 10.1371/journal.pcbi.1004993 |

|          |                                                                                                                                                   |                     |                           |      |                                       |
|----------|---------------------------------------------------------------------------------------------------------------------------------------------------|---------------------|---------------------------|------|---------------------------------------|
| 27346685 | Exome Genotyping Identifies Pleiotropic Variants Associated with Red Blood Cell Traits                                                            | Chami N             | Am J Hum Genet            | 2016 | 10.1016/j.ajhg.2016.05.007            |
| 27182959 | Targeted exonic sequencing of GWAS loci in the high extremes of the plasma lipids distribution                                                    | Patel AP            | Atherosclerosis           | 2016 | 10.1016/j.atherosclerosis.2016.04.011 |
| 27161037 | Rare-Variant Kernel Machine Test for Longitudinal Data from Population and Family Samples                                                         | Yan Q               | Hum Hered                 | 2015 | 10.1159/000445057                     |
| 27152526 | Testing Rare-Variant Association without Calling Genotypes Allows for Systematic Differences in Sequencing between Cases and Controls             | Hu YJ               | PLoS Genet                | 2016 | 10.1371/journal.pgen.1006040          |
| 27061818 | Testing Allele Transmission of an SNP Set Using a Family-Based Generalized Genetic Random Field Method                                            | Li M                | Genet Epidemiol           | 2016 | 10.1002/gepi.21970                    |
| 26964030 | Gene and pathway level analyses of germline DNA-repair gene variants and prostate cancer susceptibility using the iCOGS-genotyping array          | Saunders EJ         | Br J Cancer               | 2016 | 10.1038/bjc.2016.50                   |
| 26782979 | Gene-Based Association Analysis for Censored Traits Via Fixed Effect Functional Regressions                                                       | Fan R               | Genet Epidemiol           | 2016 | 10.1002/gepi.21947                    |
| 26740555 | Exome arrays capture polygenic rare variant contributions to schizophrenia                                                                        | Richards AL         | Hum Mol Genet             | 2016 | 10.1093/hmg/ddv620                    |
| 26736064 | Exome Sequencing Analysis in Severe, Early-Onset Chronic Obstructive Pulmonary Disease                                                            | Qiao D              | Am J Respir Crit Care Med | 2016 | 10.1164/rccm.201506-1223OC            |
| 26715663 | Meta-analysis of Complex Diseases at Gene Level with Generalized Functional Linear Models                                                         | Fan R               | Genetics                  | 2016 | 10.1534/genetics.115.180869           |
| 26693933 | Exome-based case-control association study using extreme phenotype design reveals novel candidates with protective effect in diabetic retinopathy | Shtir C             | Hum Genet                 | 2016 | 10.1007/s00439-015-1624-8             |
| 26691988 | A large genome-wide association study of age-related macular degeneration highlights contributions of rare and common variants                    | Fritsche LG         | Nat Genet                 | 2016 | 10.1038/ng.3448                       |
| 26690388 | Exome-wide association analysis reveals novel coding sequence variants associated with lipid traits in Chinese                                    | Tang CS             | Nat Commun                | 2015 | 10.1038/ncomms10206                   |
| 26619286 | Powerful Tests for Multi-Marker Association Analysis Using Ensemble Learning                                                                      | Padhukasa hasram B  | PLoS One                  | 2015 | 10.1371/journal.pone.0143489          |
| 26553438 | Recurrent Coding Sequence Variation Explains Only A Small Fraction of the Genetic Architecture of Colorectal Cancer                               | Timofeeva MN        | Sci Rep                   | 2015 | 10.1038/srep16286                     |
| 26473621 | Identification of Rare Variants in ATP8B4 as a Risk Factor for Systemic Sclerosis by Whole-Exome Sequencing                                       | Gao L               | Arthritis Rheumatol       | 2016 | 10.1002/art.39449                     |
| 26458888 | Unified tests for fine-scale mapping and identifying sparse high-dimensional sequence associations                                                | Cao S               | Bioinformatics            | 2016 | 10.1093/bioinformatics/btv586         |
| 26394601 | Family-based genome scan for age at onset of late-onset Alzheimer's disease in whole exome sequencing data                                        | Saad M              | Genes Brain Behav         | 2015 | 10.1111/gbb.12250                     |
| 26379234 | A Multi-Marker Genetic Association Test Based on the Rasch Model Applied to Alzheimer's Disease                                                   | Wang W              | PLoS One                  | 2015 | 10.1371/journal.pone.0138223          |
| 26379185 | No Major Host Genetic Risk Factor Contributed to A(H1N1)2009 Influenza Severity                                                                   | Garcia-Etxebarria K | PLoS One                  | 2015 | 10.1371/journal.pone.0135983          |

|          |                                                                                                                                                       |                |                                       |      |                              |
|----------|-------------------------------------------------------------------------------------------------------------------------------------------------------|----------------|---------------------------------------|------|------------------------------|
| 26366554 | Genome sequencing elucidates Sardinian genetic architecture and augments association analyses for lipid and blood inflammatory markers                | Sidore C       | Nat Genet                             | 2015 | 10.1038/ng.3368              |
| 26264438 | Search for new loci and low-frequency variants influencing glioma risk by exome-array analysis                                                        | Kinnersley B   | Eur J Hum Genet                       | 2016 | 10.1038/ejhg.2015.170        |
| 26252872 | Variations in the FRA10AC1 Fragile Site and 15q21 Are Associated with Cerebrospinal Fluid A $\beta$ 1-42 Level                                        | Li QS          | PLoS One                              | 2015 | 10.1371/journal.pone.0134000 |
| 26235986 | Incorporating Functional Information in Tests of Excess De Novo Mutational Load                                                                       | Jiang Y        | Am J Hum Genet                        | 2015 | 10.1016/j.ajhg.2015.06.013   |
| 26229047 | Test for rare variants by environment interactions in sequencing association studies                                                                  | Lin X          | Biometrics                            | 2016 | 10.1111/biom.12368           |
| 26199320 | Low-frequency germline variants across 6p22.2-6p21.33 are associated with non-obstructive azoospermia in Han Chinese men                              | Ni B           | Hum Mol Genet                         | 2015 | 10.1093/hmg/ddv257           |
| 26105150 | Rare and low-frequency variants and their association with plasma levels of fibrinogen, FVII, FVIII, and vWF                                          | Huffman JE     | Blood                                 | 2015 | 10.1182/blood-2015-02-624551 |
| 26079129 | Significant association between rare IPO11-HTR1A variants and attention deficit hyperactivity disorder in Caucasians                                  | Zuo L          | Am J Med Genet B Neuropsychiatr Genet | 2015 | 10.1002/ajmg.b.32329         |
| 26058849 | Gene Level Meta-Analysis of Quantitative Traits by Functional Linear Models                                                                           | Fan R          | Genetics                              | 2015 | 10.1534/genetics.115.178343  |
| 26039597 | Mutation burden of rare variants in schizophrenia candidate genes                                                                                     | Girard SL      | PLoS One                              | 2015 | 10.1371/journal.pone.0128988 |
| 25963336 | Genetic variation in uncontrolled childhood asthma despite ICS treatment                                                                              | Leusink M      | Pharmacogenomics J                    | 2016 | 10.1038/tpj.2015.36          |
| 25961151 | Rare and Coding Region Genetic Variants Associated With Risk of Ischemic Stroke: The NHLBI Exome Sequence Project                                     | Auer PL        | JAMA Neurol                           | 2015 | 10.1001/jamaneurol.2015.0582 |
| 25958224 | The cis and trans effects of the risk variants of coronary artery disease in the Chr9p21 region                                                       | Zhao W         | BMC Med Genomics                      | 2015 | 10.1186/s12920-015-0094-0    |
| 25809955 | Pleiotropy analysis of quantitative traits at gene level by multivariate functional linear models                                                     | Wang Y         | Genet Epidemiol                       | 2015 | 10.1002/gepi.21895           |
| 25740221 | Methods for association analysis and meta-analysis of rare variants in families                                                                       | Feng S         | Genet Epidemiol                       | 2015 | 10.1002/gepi.21892           |
| 25678086 | Rare variants at 16p11.2 are associated with common variable immunodeficiency                                                                         | Maggadottir SM | J Allergy Clin Immunol                | 2015 | 10.1016/j.jaci.2014.12.1939  |
| 25671699 | Pooled sequencing of 531 genes in inflammatory bowel disease identifies an associated rare variant in BTNL2 and implicates other immune related genes | Prescott NJ    | PLoS Genet                            | 2015 | 10.1371/journal.pgen.1004955 |
| 25583502 | Integrative analysis of sequencing and array genotype data for discovering disease associations with rare mutations                                   | Hu YJ          | Proc Natl Acad Sci U S A              | 2015 | 10.1073/pnas.1406143112      |
| 25519331 | Collapsing singletons may boost signal for associating rare variants in sequencing study                                                              | Wang W         | BMC Proc                              | 2014 | 10.1186/1753-6561-8-S1-S50   |

|          |                                                                                                                                                                                                   |              |                        |      |                              |
|----------|---------------------------------------------------------------------------------------------------------------------------------------------------------------------------------------------------|--------------|------------------------|------|------------------------------|
| 25519320 | Rare genetic variant analysis on blood pressure in related samples                                                                                                                                | Chen H       | BMC Proc               | 2014 | 10.1186/1753-6561-8-S1-S35   |
| 25519312 | Identification of rare variants for hypertension with incorporation of linkage information                                                                                                        | Chiu YF      | BMC Proc               | 2014 | 10.1186/1753-6561-8-S1-S109  |
| 25516442 | Genetic variants associated with longer telomere length are associated with increased lung cancer risk among never-smoking women in Asia: a report from the female lung cancer consortium in Asia | Machiela MJ  | Int J Cancer           | 2015 | 10.1002/ijc.29393            |
| 25488688 | Genome-wide association study and admixture mapping reveal new loci associated with total IgE levels in Latinos                                                                                   | Pino-Yanes M | J Allergy Clin Immunol | 2015 | 10.1016/j.jaci.2014.10.033   |
| 25360671 | Whole exome sequencing identifies novel genes for fetal hemoglobin response to hydroxyurea in children with sickle cell anemia                                                                    | Sheehan VA   | PLoS One               | 2014 | 10.1371/journal.pone.0110740 |
| 25187575 | Association of exome sequences with plasma C-reactive protein levels in >9000 participants                                                                                                        | Schick UM    | Hum Mol Genet          | 2015 | 10.1093/hmg/ddu450           |
| 25135348 | Genetic variation at glucose and insulin trait loci and response to glucose-insulin-potassium (GIK) therapy: the IMMEDIATE trial                                                                  | Ellis KL     | Pharmacogenomics J     | 2015 | 10.1038/tpj.2014.41          |
| 25078778 | Distribution and medical impact of loss-of-function variants in the Finnish founder population                                                                                                    | Lim ET       | PLoS Genet             | 2014 | 10.1371/journal.pgen.1004494 |
| 24876117 | Sequencing of LRP2 reveals multiple rare variants associated with urinary trefoil factor-3                                                                                                        | McMahon GM   | J Am Soc Nephrol       | 2014 | 10.1681/ASN.2013.11.1240     |
| 24728188 | No large-effect low-frequency coding variation found for myocardial infarction                                                                                                                    | Holmen OL    | Hum Mol Genet          | 2014 | 10.1093/hmg/ddu175           |
| 24561134 | Exome sequencing implicates an increased burden of rare potassium channel variants in the risk of drug-induced long QT interval syndrome                                                          | Weeke P      | J Am Coll Cardiol      | 2014 | 10.1016/j.jacc.2014.01.031   |
| 24507775 | Whole-exome sequencing identifies rare and low-frequency coding variants associated with LDL cholesterol                                                                                          | Lange LA     | Am J Hum Genet         | 2014 | 10.1016/j.ajhg.2014.01.010   |
| 24507774 | Association of low-frequency and rare coding-sequence variants with blood lipids and coronary heart disease in 56,000 whites and blacks                                                           | Peloso GM    | Am J Hum Genet         | 2014 | 10.1016/j.ajhg.2014.01.009   |
| 24212883 | A large-scale screen for coding variants predisposing to psoriasis                                                                                                                                | Tang H       | Nat Genet              | 2014 | 10.1038/ng.2827              |
| 24159917 | Gastrointestinal stromal tumors: a case-only analysis of single nucleotide polymorphisms and somatic mutations                                                                                    | O'Brien KM   | Clin Sarcoma Res       | 2013 | 10.1186/2045-3329-3-12       |
| 24151499 | New insights into the genetic mechanism of IQ in autism spectrum disorders                                                                                                                        | Wang HZ      | Front Genet            | 2013 | 10.3389/fgene.2013.00195     |
| 24022295 | A fast multilocus test with adaptive SNP selection for large-scale genetic-association studies                                                                                                    | Zhang H      | Eur J Hum Genet        | 2014 | 10.1038/ejhg.2013.201        |
| 23966874 | A flexible approach for the analysis of rare variants allowing for a mixture of effects on binary or quantitative traits                                                                          | Clarke GM    | PLoS Genet             | 2013 | 10.1371/journal.pgen.1003694 |
| 23891470 | Meta-analysis of gene-level associations for rare variants based on single-variant statistics                                                                                                     | Hu YJ        | Am J Hum Genet         | 2013 | 10.1016/j.ajhg.2013.06.011   |

|          |                                                                                                                              |                    |                               |      |                                    |
|----------|------------------------------------------------------------------------------------------------------------------------------|--------------------|-------------------------------|------|------------------------------------|
| 23778322 | Rare SERINC2 variants are specific for alcohol dependence in individuals of European descent                                 | Zuo L              | Pharmacogenomics              | 2013 | 10.1097/FPC.0b013e328362f9f2       |
| 23483651 | A unified mixed-effects model for rare-variant association in sequencing studies                                             | Sun J              | Genet Epidemiol               | 2013 | 10.1002/gepi.21717                 |
| 23358228 | A hybrid likelihood model for sequence-based disease association studies                                                     | Chen YC            | PLoS Genet                    | 2013 | 10.1371/journal.pgen.1003224       |
| 23263489 | Exome array analysis identifies new loci and low-frequency variants influencing insulin processing and secretion             | Huyghe JR          | Nat Genet                     | 2013 | 10.1038/ng.2507                    |
| 23176082 | Weighted pedigree-based statistics for testing the association of rare variants                                              | Shugart YY         | BMC Genomics                  | 2012 | 10.1186/1471-2164-13-667           |
| 22889854 | Quantitative trait locus analysis for next-generation sequencing with the functional linear models                           | Luo L              | J Med Genet                   | 2012 | 10.1136/jmedgenet-2012-100798      |
| 22641211 | Exome sequencing and the genetic basis of complex traits                                                                     | Kiezun A           | Nat Genet                     | 2012 | 10.1038/ng.2303                    |
| 21738570 | From SNPs to genes: disease association at the gene level                                                                    | Lehne B            | PLoS One                      | 2011 | 10.1371/journal.pone.0020133       |
| 20876667 | Genome-wide significant associations for variants with minor allele frequency of 5% or less--an overview: A HuGE review      | Panagiotou OA      | Am J Epidemiol                | 2010 | 10.1093/aje/kwq234                 |
| 20852893 | Rare variation at the TNFAIP3 locus and susceptibility to rheumatoid arthritis                                               | Bowes J            | Hum Genet                     | 2010 | 10.1007/s00439-010-0889-1          |
| 20691247 | A genome-wide association study of Cloninger's temperament scales: implications for the evolutionary genetics of personality | Verweij KJ         | Biol Psychol                  | 2010 | 10.1016/j.biopsycho.2010.07.018    |
| 20549515 | Genome-wide searching of rare genetic variants in WTCCC data                                                                 | Feng T             | Hum Genet                     | 2010 | 10.1007/s00439-010-0849-9          |
| 20433910 | Genome-wide approaches to schizophrenia                                                                                      | Duan J             | Brain Res Bull                | 2010 | 10.1016/j.brainresbull.2010.04.009 |
| 20421590 | Genetic causes of high and low serum HDL-cholesterol                                                                         | Weissglas-Volkov D | J Lipid Res                   | 2010 | 10.1194/jlr.R004739                |
| 19847924 | Detecting rare variants for complex traits using family and unrelated data                                                   | Zhu X              | Genet Epidemiol               | 2010 | 10.1002/gepi.20449                 |
| 19571035 | Finding common susceptibility variants for complex disease: past, present and future                                         | Panoutsopoulos K   | Brief Funct Genomic Proteomic | 2009 | 10.1093/bfgp/elp020                |
| 19264985 | Rare variants of IFIH1, a gene implicated in antiviral responses, protect against type 1 diabetes                            | Nejentsev S        | Science                       | 2009 | 10.1126/science.1167728            |
